# Supplementary material for: DNA Damage Response Alterations in Ovarian Cancer: From Molecular Mechanisms to Therapeutic Opportunities
Source: MDPI journal article supplement (doi:10.3390/cancers15020448), 2023-01-10
Supplement: s1 [file s1]

| Drug     | Combined with | Condition                                                 | Phase    | Clinical trial ID | Results                                                                                                                                                                  |
|----------|---------------|-----------------------------------------------------------|----------|-------------------|--------------------------------------------------------------------------------------------------------------------------------------------------------------------------|
| Olaparib | -             | BRCA-mutated platinum-sensitive HGSC OC                   | Phase I  | NCT02855697       | No results posted                                                                                                                                                        |
|          |               | BRCA-mutated OC                                           | Phase I  | NCT03943173       | No results posted, recruiting patients                                                                                                                                   |
|          |               | BRCA-mutated recurrent OC                                 | Phase I  | NCT05258747       | No results posted, recruiting patients                                                                                                                                   |
|          |               |                                                           | Phase I  | NCT04041128       | No results posted                                                                                                                                                        |
|          |               | OC                                                        | Phase I  | NCT03378297       | No results posted, recruiting patients                                                                                                                                   |
|          |               | OC                                                        | Phase II | NCT02489006       | No results posted                                                                                                                                                        |
|          |               | Relapsed OC                                               | Phase II | NCT02822157       | Olaparib statistically showed a favorable response rate in heavily pre-treated relapsed OC compromising mainly platinum-resistant and patients with BRCA mutations [294] |
|          |               | Recurrent OC                                              | Phase II | NCT04780945       | No results posted                                                                                                                                                        |
|          |               |                                                           |          | NCT04377087       | No results posted                                                                                                                                                        |
|          |               |                                                           |          | NCT03470805       | No results posted                                                                                                                                                        |
|          |               | BRCA-mutated recurrent OC                                 | Phase II | NCT00679783       | Olaparib demonstrated promising results in recurrent OC patients with BRCA mutations [295]                                                                               |
|          |               | BRCA-mutated advanced OC                                  | Phase II | NCT01078662       | Olaparib demonstrated notable antitumor activity in heavily pre-treated OC patients with advanced tumors that harbored BRCA mutations [296]                              |
|          |               |                                                           | Phase II | NCT00494442       | Olaparib demonstrated notable antitumor activity in advanced OC patients with BRCA mutations [297]                                                                       |
|          |               | BRCA-wild type recurrent OC                               | Phase II | NCT04091204       | No results posted, recruiting patients                                                                                                                                   |
|          |               |                                                           | Phase II | NCT05233982       | No results posted, recruiting patients                                                                                                                                   |
|          |               | Platinum-sensitive relapsed OC with mutations in HR genes | Phase II | NCT02983799       | Olaparib treatment was well-tolerated and demonstrated activity in BRCA-mutated non-BRCA-mutated, and HR-mutated OC patients [298]                                       |

|  |  |                                            |           |             |                                                                                                                                                                                                                                                                                           |
|--|--|--------------------------------------------|-----------|-------------|-------------------------------------------------------------------------------------------------------------------------------------------------------------------------------------------------------------------------------------------------------------------------------------------|
|  |  | Platinum-sensitive relapsed OC             | Phase II  | NCT00753545 | Platinum-sensitive relapsed or recurrent OC patients with <i>BRCA</i> mutations treated with olaparib had longer overall survival and progression-free survival [299,300]                                                                                                                 |
|  |  | Advanced tumors with mutations in HR genes | Phase II  | NCT03742895 | No results posted                                                                                                                                                                                                                                                                         |
|  |  |                                            | Phase II  | NCT03967938 | No results posted, recruiting patients                                                                                                                                                                                                                                                    |
|  |  | <i>BRCA</i> -mutated OC                    | Phase III | NCT01844986 | The use of olaparib as a maintenance therapy improved progression-free survival and decreased risk of progression or death in advanced OC with <i>BRCA</i> mutations [301,304]                                                                                                            |
|  |  |                                            | Phase III | NCT02282020 | Olaparib statistically improved objective response ratio and progression-free survival compared to non-platinum chemotherapy in platinum-sensitive relapsed OC patients with germline <i>BRCA</i> mutations that had received at least 2 prior lines of platinum-based chemotherapy [305] |
|  |  |                                            | Phase III | NCT01874353 | Olaparib as a maintenance treatment significantly improved progression-free survival in platinum-sensitive OC patients with germline <i>BRCA</i> mutations [306]                                                                                                                          |
|  |  | <i>BRCA</i> -wild type OC                  | Phase III | NCT03402841 | Maintenance olaparib treatment demonstrated clinical benefit in patients with non-mutated <i>BRCA</i> genes [307]                                                                                                                                                                         |
|  |  | <i>BRCA</i> -wild type advanced OC         | Phase III | NCT04884360 | No results posted, recruiting patients                                                                                                                                                                                                                                                    |
|  |  | Relapsed OC                                | Phase III | NCT03534453 | The maintenance treatment with olaparib demonstrated effectivity and being well-tolerated in platinum-sensitive relapsed Asian OC patients regardless <i>BRCA</i> status [308]                                                                                                            |
|  |  |                                            |           | NCT03106987 | Olaparib maintenance treatment was safe and improved progression-free survival regardless <i>BRCA</i> status and a proportion presented a clinically relevant long-term benefit [309]                                                                                                     |
|  |  | OC                                         | Phase III | NCT04421963 | No results posted                                                                                                                                                                                                                                                                         |
|  |  | Recurrent OC                               | Phase III | NCT05255471 | No results posted, recruiting patients                                                                                                                                                                                                                                                    |

|  |                                      |                                                           |               |             |                                                                                                                                                                                                                                                  |
|--|--------------------------------------|-----------------------------------------------------------|---------------|-------------|--------------------------------------------------------------------------------------------------------------------------------------------------------------------------------------------------------------------------------------------------|
|  |                                      | Platinum-sensitive relapsed OC with <i>BRCA</i> -mutation | Phase IV      | NCT04330040 | Olaparib was well-tolerated and safety for Indian patients with platinum-sensitive relapsed OC in partial or complete response to platinum-base chemotherapy [310]                                                                               |
|  |                                      | <i>BRCA</i> - or <i>HR</i> -mutated genes OC              | Phase IV      | NCT02476968 | Progression-free survival in patients with platinum-sensitive relapsed OC who received olaparib as maintenance treatment was similar regardless <i>BRCA</i> or <i>HR</i> -genes status [311]                                                     |
|  |                                      | Cancer                                                    | Phase IV      | NCT05078671 | No results posted, recruiting patients                                                                                                                                                                                                           |
|  |                                      | Solid tumors                                              | Observational | NCT02489058 | No results posted                                                                                                                                                                                                                                |
|  |                                      | OC                                                        | Observational | NCT04699006 | No results posted                                                                                                                                                                                                                                |
|  |                                      |                                                           |               | NCT04553926 | No results posted, recruiting patients                                                                                                                                                                                                           |
|  |                                      | <i>BRCA</i> -mutated platinum- sensitive relapsed OC      | Observational | NCT02503436 | Olaparib was well-tolerated under routine condition in this cohort of patients [312]                                                                                                                                                             |
|  |                                      | <i>BRCA</i> -wild type OC                                 | Observational | NCT05153603 | Not yet recruiting                                                                                                                                                                                                                               |
|  |                                      | <i>BRCA</i> -mutated platinum- sensitive recurrent OC     | Observational | NCT02262273 | No results posted                                                                                                                                                                                                                                |
|  |                                      | Relapsed OC                                               | Observational | NCT04152941 | Efficacy and toxicity were like those obtained in NCT01874353 and NCT00753545 [313]                                                                                                                                                              |
|  |                                      |                                                           |               | NCT03505307 | No results posted                                                                                                                                                                                                                                |
|  |                                      | <i>BRCA</i> -mutated advanced OC                          | Observational | NCT04532645 | Safety was like that obtained in previous reports of olaparib maintenance treatment [314]                                                                                                                                                        |
|  |                                      | OC                                                        | Observational | NCT04560452 | No results posted, recruiting patients                                                                                                                                                                                                           |
|  | Cisplatin + Paclitaxel + Bevacizumab | OC                                                        | Phase I       | NCT02121990 | Olaparib added to cisplatin/paclitaxel/bevacizumab was feasible [315]                                                                                                                                                                            |
|  | Carboplatin + paclitaxel             | Relapsed OC                                               | Phase I/II    | NCT01650376 | Olaparib/carboplatin/paclitaxel could be co-administered safely in pre-treated relapsed OC with 24% completed remission. <i>BRCA</i> -mutated patients had statistically significant longer progression-free survival and overall survival [316] |

|  |                             |                                            |               |             |                                                                                                                                                                                                                                                            |
|--|-----------------------------|--------------------------------------------|---------------|-------------|------------------------------------------------------------------------------------------------------------------------------------------------------------------------------------------------------------------------------------------------------------|
|  |                             | Unresectable OC                            | Phase II      | NCT04261465 | No results posted, recruiting patients                                                                                                                                                                                                                     |
|  |                             | Platinum-sensitive advanced OC             | Phase II      | NCT01081951 | Olaparib/paclitaxel/carboplatin combination followed by maintenance monotherapy significantly improved progression-free survival compared to paclitaxel/carboplatin, with a greater benefit in <i>BRCA</i> -mutated patients, and was well-tolerated [317] |
|  | PLD                         | <i>BRCA</i> -mutated relapsed OC           | Phase II      | NCT00628251 | Olaparib treatment was efficacy in <i>BRCA</i> -mutated advanced OC patients after a platinum-free survival lower than 12 months and was not statistically different from PLD-efficacy [318]                                                               |
|  |                             | Platinum-resistant persistent OC           | Phase II      | NCT03161132 | No results posted                                                                                                                                                                                                                                          |
|  | Bevacizumab                 | Advanced OC                                | Phase III     | NCT02477644 | The addition of olaparib to bevacizumab maintenance therapy increased progression-free survival in patients with advanced OC specially in patients with mutations in <i>BRCA</i> and HR genes [319-322]                                                    |
|  |                             | <i>BRCA</i> -wild type OC                  | Observational | NCT05440578 | Not yet recruiting                                                                                                                                                                                                                                         |
|  | Pembrolizumab               | Advanced tumors with mutations in HR genes | Phase II      | NCT04123366 | No results posted, recruiting patients                                                                                                                                                                                                                     |
|  |                             | OC HR-mutated genes                        | Phase II      | NCT04417192 | No results posted, recruiting patients                                                                                                                                                                                                                     |
|  |                             | <i>BRCA</i> -wild type advanced OC         | Phase III     | NCT03740165 | No results posted                                                                                                                                                                                                                                          |
|  | Pembrolizumab + bevacizumab | Platinum-sensitive recurrent OC            | Phase II      | NCT04361370 | Olaparib/pembrolizumab/bevacizumab triple combination presented a potential benefit in <i>BRCA</i> -wild type patients. This combination showed a manageable safety profile [323]                                                                          |
|  |                             |                                            | Phase II      | NCT05158062 | No results posted, recruiting patients                                                                                                                                                                                                                     |
|  | Carboplatin                 | Recurrent or refractory women cancers      | Phase I       | NCT01237067 | Pharmacokinetics of olaparib in presence or absence of carboplatin was assessed, recommending no-dose adjustment [324]                                                                                                                                     |

|  |               |                                                                 |            |             |                                                                                                                                                                                                                                            |
|--|---------------|-----------------------------------------------------------------|------------|-------------|--------------------------------------------------------------------------------------------------------------------------------------------------------------------------------------------------------------------------------------------|
|  |               | OC                                                              | Phase I    | NCT01445418 | Olaparib/carboplatin combination was safe and presented activity in <i>BRCA</i> -mutated patients [325]                                                                                                                                    |
|  |               | Advanced cancers                                                | Phase I    | NCT02418624 | Maximum tolerable dose of olaparib combined with two carboplatin cycles was established. This combination was feasible and relatively well-tolerated and showed a promising antitumor activity with a great decrease in tumor volume [326] |
|  | Cobicistat    | Cancer                                                          | Phase IV   | NCT05078671 | No results posted, recruiting patients                                                                                                                                                                                                     |
|  | Lurbinectedin | Advanced solid tumors                                           | Phase I/II | NCT02684318 | Lurbinectedin/olaparib combination was feasible and recommended doses were obtained for each drug [192]                                                                                                                                    |
|  | CYH33         | Advanced solid tumors                                           | Phase I    | NCT04586335 | No results posted, recruiting patients                                                                                                                                                                                                     |
|  | Abemaciclib   | Platinum-resistant recurrent OC                                 | Phase I    | NCT04633239 | No results posted, recruiting patients                                                                                                                                                                                                     |
|  | Alpelisib     | <i>BRCA</i> -wild type platinum-resistant or refractory HGSC OC | Phase III  | NCT04729387 | No results posted, recruiting patients                                                                                                                                                                                                     |
|  | Anlotinib     | Platinum-sensitive recurrent OC                                 | Phase II   | NCT04566952 | No results posted, recruiting patients                                                                                                                                                                                                     |
|  | Cediranib     | Recurrent OC                                                    | Phase I/II | NCT01116648 | The addition of cediranib to olaparib treatment extended progression-free survival and overall survival in relapsed platinum-sensitive OC mainly in patients without <i>BRCA</i> mutations [327,328]                                       |
|  |               | Recurrent OC                                                    | Phase II   | NCT02345265 | No results posted                                                                                                                                                                                                                          |
|  |               |                                                                 |            | NCT03314740 | Cediranib/olaparib combination was active but was not superior to chemotherapy in heavily pre-treated platinum-resistant OC patients [329]                                                                                                 |
|  |               | OC                                                              | Phase II   | NCT02681237 | Cediranib/olaparib activity varied according to the mechanism of PARPi-resistance [330]                                                                                                                                                    |
|  |               |                                                                 |            | NCT02340611 | No results posted                                                                                                                                                                                                                          |

|  |                          |                                                          |              |             |                                                                                                                                                                                                                                                     |
|--|--------------------------|----------------------------------------------------------|--------------|-------------|-----------------------------------------------------------------------------------------------------------------------------------------------------------------------------------------------------------------------------------------------------|
|  |                          | Recurrent platinum-resistant OC                          | Phase II     | NCT02889900 | Cediranib/olaparib combination showed a clinical activity in heavily pre-treated <i>BRCA</i> -wild type platinum-resistant OC patients [331]                                                                                                        |
|  |                          | Platinum-resistant OC                                    | Phase II     | NCT03117933 | Cediranib/olaparib showed a greater efficacy than monotherapy treatments [332]                                                                                                                                                                      |
|  |                          |                                                          | Phase II/III | NCT02502266 | No results posted                                                                                                                                                                                                                                   |
|  |                          | Platinum-sensitive recurrent OC                          | Phase III    | NCT02446600 | Cediranib/olaparib demonstrated similar activity to standard chemotherapy in platinum-sensitive relapsed OC patients [333]. Patients with mutations in <i>BRCA</i> genes cediranib/olaparib treatment presented significant clinical activity [334] |
|  |                          | Relapsed OC                                              | Phase III    | NCT03278717 | No results posted, recruiting patients                                                                                                                                                                                                              |
|  | Ceralasertib             | Recurrent OC                                             | Phase II     | NCT03462342 | The combination of ceralasertib and olaparib was well-tolerated. No objective response was observed; however, a signal of activity was observed and depended on <i>BRCA1</i> status [198]                                                           |
|  |                          | Recurrent OC                                             | Phase II     | NCT03579316 | No results posted about ceralasertib/olaparib combination                                                                                                                                                                                           |
|  |                          | Gynecological cancers                                    | Phase II     | NCT04065269 | No results posted, recruiting patients                                                                                                                                                                                                              |
|  |                          | Advanced solid tumors                                    | Phase II     | NCT02576444 | Ceralasertib/olaparib combination has demonstrated preliminary activity in <i>ATM</i> -mutated tumors and in <i>BRCA</i> -mutated PARPi-resistant HGSC OC patients [199]                                                                            |
|  | Vistusertib/capivasertib | OC                                                       | Phase I/II   | NCT02208375 | No results posted                                                                                                                                                                                                                                   |
|  | Copanlisib               | Platinum-resistant recurrent OC                          | Phase II     | NCT05295589 | No results posted, recruiting patients                                                                                                                                                                                                              |
|  | Entinostat               | Recurrent, platinum-refractory, or platinum-resistant OC | Phase I      | NCT03924245 | No results posted                                                                                                                                                                                                                                   |
|  | EP0057                   | Advanced OC                                              | Phase II     | NCT04669002 | No results posted                                                                                                                                                                                                                                   |

|  |                              |                                        |            |             |                                                                                                                                                                                                                       |
|--|------------------------------|----------------------------------------|------------|-------------|-----------------------------------------------------------------------------------------------------------------------------------------------------------------------------------------------------------------------|
|  | Onalespib                    | Metastatic or recurrent OC             | Phase I    | NCT02898207 | No results posted                                                                                                                                                                                                     |
|  | Selumetinib                  | RAS-mutated OC                         | Phase I    | NCT05554328 | Olaparib/selumetinib combination was well-tolerated and showed promising preliminary antitumor activity in patients with mutations in <i>RAS</i> [335]                                                                |
|  |                              | RAS-mutated recurrent or persistent OC | Phase II   | NCT03162627 | Not yet recruiting patients                                                                                                                                                                                           |
|  | NUV-868                      | Advanced solid tumors                  | Phase I/II | NCT05252390 | No results posted                                                                                                                                                                                                     |
|  | Navitoclax                   | HGSC OC                                | Phase I    | NCT05358639 | Not yet recruiting patients                                                                                                                                                                                           |
|  | BKM120/<br>BYL719            | HGSC OC                                | Phase I    | NCT01623349 | BKM120/olaparib combination was feasible; however low dose of BKM120 should be administrated. Clinical benefit was observed regardless <i>BRCA</i> status [336]                                                       |
|  | Adavosertib                  | Recurrent OC                           | Phase II   | NCT03579316 | Adavosertib in monotherapy or combined with olaparib demonstrated efficacy in patients with resistance to PARPi. Adavosertib/olaparib combination presented manageable toxicities [215-217]                           |
|  |                              | Refractory solid tumors                | Phase I    | NCT02511795 |                                                                                                                                                                                                                       |
|  |                              | Advanced solid tumors                  | Phase II   | NCT02576444 |                                                                                                                                                                                                                       |
|  | Durvalumab                   | OC                                     | Phase II   | NCT04644289 | No results posted, recruiting patients                                                                                                                                                                                |
|  | Durvalumab+/-<br>bevacizumab | Advanced solid tumors                  | Phase I/II | NCT02734004 | Olaparib/durvalumab/bevacizumab demonstrated promising efficacy in platinum-sensitive OC patients without <i>BRCA</i> mutations. Olaparib/durvalumab and olaparib/durvalumab/bevacizumab combinations were safe [337] |
|  |                              |                                        | Phase II   | NCT04015739 | No results posted                                                                                                                                                                                                     |
|  |                              | Advanced OC                            | Phase III  | NCT03737643 | No results posted                                                                                                                                                                                                     |
|  | Durvalumab +/-<br>cedinabir  | Advanced or recurrent OC               | Phase I/II | NCT02484404 | No results posted, recruiting patients                                                                                                                                                                                |

|           |                           |                                                             |            |             |                                                                                                                                                                                         |
|-----------|---------------------------|-------------------------------------------------------------|------------|-------------|-----------------------------------------------------------------------------------------------------------------------------------------------------------------------------------------|
|           | Durvalumab + tremelimumab | <i>BRCA</i> -mutated recurrent, resistant, or refractory OC | Phase II   | NCT02953457 | Olaparib/durvalumab/tremelimumab was safe and seemed to increase progression-free survival                                                                                              |
|           | Durvalumab + UV1          | <i>BRCA</i> -wild-type recurrent OC                         | Phase II   | NCT04742075 | No results posted, recruiting patients                                                                                                                                                  |
|           | Tremelimumab              | Persistent OC                                               | Phase I    | NCT02485990 | No results posted                                                                                                                                                                       |
|           |                           | <i>BRCA</i> -mutated recurrent OC                           | Phase I/II | NCT02571725 | Olaparib/tremelimumab was tolerable in heavily pre-treated <i>BRCA</i> -mutated recurrent OC and demonstrated evidence of therapeutic effect [338]                                      |
|           |                           | Platinum-sensitive recurrent OC                             | Phase II   | NCT04034927 | No results posted                                                                                                                                                                       |
| Niraparib | -                         | OC                                                          | Phase I    | NCT03551171 | Niraparib was well tolerated, and the toxicity was manageable in Chinese OC patients [339]                                                                                              |
|           |                           | Advanced solid tumors                                       | Phase I    | NCT03359850 | Niraparib dose was adjusted in patients with advanced solid tumors, including OC that presented normal hepatic function or moderate hepatic impairment [340]                            |
|           |                           | Solid tumors                                                | Phase I    | NCT00749502 | No results posted                                                                                                                                                                       |
|           |                           | Platinum-sensitive recurrent OC                             | Phase II   | NCT03891576 | No results posted, recruiting patients                                                                                                                                                  |
|           |                           | OC                                                          | Phase II   | NCT04641247 | No results posted                                                                                                                                                                       |
|           |                           | Advanced OC                                                 | Phase II   | NCT04284852 | No results posted, recruiting patients                                                                                                                                                  |
|           |                           | Advanced relapsed OC                                        | Phase II   | NCT02354586 | Niraparib demonstrated clinically relevant activity in heavily pre-treated OC patients, especially those platinum-sensitive with homologous recombination repair deficiency [341]       |
|           |                           | Advanced relapsed OC                                        | Phase II   | NCT04392102 | No results posted                                                                                                                                                                       |
|           |                           | Unresectable OC                                             | Phase II   | NCT04507841 | Neoadjuvant niraparib treatment showed efficacy and tolerable toxicity in <i>BRCA</i> -mutated or homologous recombination repair deficiency OC patients with unresectable tumors [342] |



|  |  |                                        |               |             |                                                                                                                                                                                                                                                                                                                                                                                                                                               |
|--|--|----------------------------------------|---------------|-------------|-----------------------------------------------------------------------------------------------------------------------------------------------------------------------------------------------------------------------------------------------------------------------------------------------------------------------------------------------------------------------------------------------------------------------------------------------|
|  |  | Relapsed OC                            | Phase II      | NCT03759587 | The profile of safety was acceptable and similar to other studies [343]                                                                                                                                                                                                                                                                                                                                                                       |
|  |  | Advanced relapsed OC                   | Phase II      | NCT03759600 | Niraparib showed to be efficacy and safety in heavily pre-treated advanced relapsed OC patients with homologous recombination deficiency [344]                                                                                                                                                                                                                                                                                                |
|  |  | Homologous recombination deficiency OC | Phase III     | NCT05460000 | Not yet recruiting                                                                                                                                                                                                                                                                                                                                                                                                                            |
|  |  | Advanced OC                            | Phase III     | NCT03709316 | Niraparib prolonged progression-free survival regardless of chemotherapy response and biomarker status [345]                                                                                                                                                                                                                                                                                                                                  |
|  |  | Advanced OC                            | Phase III     | NCT02655016 | Niraparib had a similar efficacy in advanced OC patients that had been undergone to primary debulking surgery than those who had been treated with neoadjuvant chemotherapy or interval debulking surgery. Patients treated with neoadjuvant chemotherapy or interval debulking surgery and who presented visible residual disease presented the highest reduction in the risk of progression with niraparib as a maintenance treatment [346] |
|  |  | Platinum-sensitive relapsed OC         | Phase III     | NCT03705156 | No results posted                                                                                                                                                                                                                                                                                                                                                                                                                             |
|  |  | Platinum-sensitive OC                  | Phase III     | NCT01847274 | Niraparib maintenance treatment presented clinical benefits in platinum-sensitive OC regardless of response to last platinum-based chemotherapy, and less time without toxicity symptoms [347-348]                                                                                                                                                                                                                                            |
|  |  | Relapsed OC                            | Phase IV      | NCT03752216 | No results posted                                                                                                                                                                                                                                                                                                                                                                                                                             |
|  |  | OC                                     | Phase IV      | NCT04861181 | No results posted, recruiting patients                                                                                                                                                                                                                                                                                                                                                                                                        |
|  |  | BRCA-wild type advanced OC             | Phase IV      | NCT05187208 | Not yet recruiting                                                                                                                                                                                                                                                                                                                                                                                                                            |
|  |  | OC                                     | Observational | NCT04295577 | No results posted, recruiting patients                                                                                                                                                                                                                                                                                                                                                                                                        |
|  |  | OC                                     | Observational | NCT05021562 | No results posted, recruiting patients                                                                                                                                                                                                                                                                                                                                                                                                        |

|  |                  |                                            |               |             |                                                                                                                                                                                                                                                         |
|--|------------------|--------------------------------------------|---------------|-------------|---------------------------------------------------------------------------------------------------------------------------------------------------------------------------------------------------------------------------------------------------------|
|  |                  | OC                                         | Observational | NCT04589039 | No results posted, recruiting patients                                                                                                                                                                                                                  |
|  |                  | OC                                         | Observational | NCT05583799 | Not yet recruiting                                                                                                                                                                                                                                      |
|  |                  | OC                                         | Observational | NCT04986371 | Not yet recruiting                                                                                                                                                                                                                                      |
|  |                  | Platinum-sensitive recurrent OC            | Observational | NCT04546373 | No results posted                                                                                                                                                                                                                                       |
|  |                  | Platinum-sensitive responsive recurrent OC | Observational | NCT04617470 | No results posted, recruiting patients                                                                                                                                                                                                                  |
|  |                  | <i>BRCA</i> -wild type recurrent OC        | Observational | NCT04785716 | Niraparib as maintenance treatment has shown effectivity and a safe toxicity profile in patients with <i>BRCA</i> non-mutated recurrent platinum sensitive OC patients. The Individualized dosing was essential for minimizing the adverse events [349] |
|  | Anlotinib        | Platinum-resistant recurrent OC            | Phase II      | NCT04376073 | Niraparib/anlotinib combination showed promising antitumor activity in patients with platinum-resistant recurrent OC [350]                                                                                                                              |
|  |                  | Recurrent OC                               | Phase II      | NCT05130515 |                                                                                                                                                                                                                                                         |
|  |                  | OC                                         | Phase II      | NCT05311579 | No results posted, recruiting patients                                                                                                                                                                                                                  |
|  |                  | Platinum-sensitive recurrent OC            | Phase II      | NCT05385068 | Not yet recruiting                                                                                                                                                                                                                                      |
|  | AsiDNATM         | Platinum-sensitive relapsed OC             | Phase I/II    | NCT04826198 | No results posted, recruiting patients                                                                                                                                                                                                                  |
|  | +/- atezolizumab | Recurrent OC                               | Phase III     | NCT03598270 | No results posted                                                                                                                                                                                                                                       |
|  | Bevacizumab      | Platinum-sensitive OC                      | Phase I/II    | NCT02354131 | Niraparib/bevacizumab was well tolerated and showed a promising clinical statistical activity in platinum-sensitive recurrent OC patients [351-353]                                                                                                     |
|  |                  | Platinum-sensitive recurrent OC            | Phase II      | NCT04734665 | No results posted, recruiting patients                                                                                                                                                                                                                  |
|  |                  | <i>ARID1A</i> -mutated recurrent OC        | Phase II      | NCT05523440 | Not yet recruiting                                                                                                                                                                                                                                      |

|  |                                                                |                                               |              |             |                                                                                                                                                                                                                                                |
|--|----------------------------------------------------------------|-----------------------------------------------|--------------|-------------|------------------------------------------------------------------------------------------------------------------------------------------------------------------------------------------------------------------------------------------------|
|  |                                                                | Advanced OC                                   | Phase II     | NCT03326193 | Niraparib/bevacizumab as a first-line maintenance treatment showed promising results. This combination was safe, similar to safety profiles of monotherapy treatments [354]                                                                    |
|  |                                                                | Advanced OC                                   | Phase II     | NCT05183984 | No results posted, recruiting patients                                                                                                                                                                                                         |
|  |                                                                | Platinum-resistant or refractory recurrent OC | Phase II     | NCT04556071 | No results posted                                                                                                                                                                                                                              |
|  |                                                                | Advanced OC                                   | Phase III    | NCT05009082 | No results posted, recruiting patients                                                                                                                                                                                                         |
|  | Brivanib                                                       | Recurrent OC                                  | Phase I      | NCT03895788 | No results posted                                                                                                                                                                                                                              |
|  | +/- carboplatin/<br>bevacizumab/<br>dostarlimab/<br>paclitaxel | OC                                            | Phase I/II   | NCT03574779 | Niraparib/bevacizumab/dostarlimab triple combination was tolerable and demonstrated clinical activity in platinum-resistant OC, most of the patients were <i>BRCA</i> - wild type and presented a normal homologous recombination repair [355] |
|  | Cobimetinib +/-<br>atezolizumab                                | Advanced platinum-sensitive OC                | Phase I      | NCT03695380 | No results posted, recruiting patients                                                                                                                                                                                                         |
|  | Copanlisib                                                     | Recurrent OC                                  | Phase I      | NCT03586661 | No results posted, recruiting patients                                                                                                                                                                                                         |
|  | Dostarlimab                                                    | <i>BRCA</i> -mutated OC                       | Phase I      | NCT04673448 | No results posted, recruiting patients                                                                                                                                                                                                         |
|  |                                                                | Platinum-resistant OC                         | Phase II     | NCT03955471 | Niraparib/dostarlimab combination was safe; however, this combination presented a low overall ratio of response [356]                                                                                                                          |
|  |                                                                | Relapsed OC                                   | Phase II     | NCT05126342 | Not yet recruiting                                                                                                                                                                                                                             |
|  |                                                                | Recurrent OC                                  | Phase II/III | NCT03651206 | No results posted, recruiting patients                                                                                                                                                                                                         |
|  |                                                                | Recurrent OC                                  | Phase III    | NCT04679064 | No results posted, recruiting patients                                                                                                                                                                                                         |
|  | Dostarlimab +<br>platinum-base<br>chemotherapy                 | Advanced OC                                   | Phase III    | NCT03602859 | No results posted                                                                                                                                                                                                                              |
|  | Elimusertib                                                    | Advanced OC                                   | Phase I      | NCT04267939 | No results posted                                                                                                                                                                                                                              |
|  | Etoposide                                                      | Platinum-resistant or refractory recurrent OC | Phase II     | NCT04217798 | No results posted, recruiting patients                                                                                                                                                                                                         |

|             |               |                                               |            |             |                                                                                                                                                                                 |
|-------------|---------------|-----------------------------------------------|------------|-------------|---------------------------------------------------------------------------------------------------------------------------------------------------------------------------------|
|             | Everolimus    | Advanced OC                                   | Phase I    | NCT03154281 | No results posted                                                                                                                                                               |
|             | Ganetespiib   | Platinum-sensitive OC                         | Phase II   | NCT03783949 | No results posted                                                                                                                                                               |
|             | Gartisertib   | PARPi resistant and recurrent OC              | Phase I    | NCT04149145 | Not yet recruiting patients                                                                                                                                                     |
|             | Neratinib     | Advanced OC                                   | Phase I    | NCT04502602 | No results posted, recruiting patients                                                                                                                                          |
|             | Oregomovab    | Platinum-sensitive recurrent OC               | Phase II   | NCT05335993 | No results posted, recruiting patients                                                                                                                                          |
|             | Pembrolizumab | Recurrent OC                                  | Phase I/II | NCT02657889 | Niraparib/pembrolizumab combination was tolerable with promising antitumor activity even in patients without homologous recombination deficiency or <i>BRCA</i> mutations [357] |
|             | PLD           | Advanced OC                                   | Phase I    | NCT01227941 | No results posted                                                                                                                                                               |
|             | Surgery       | Platinum-sensitive recurrent OC               | Phase II   | NCT03983226 | No results posted, recruiting patients                                                                                                                                          |
|             | ZN-c3         | Platinum-resistant OC                         | Phase I/II | NCT05198804 | No results posted, recruiting patients                                                                                                                                          |
| Talazoparib | -             | Advanced solid tumors                         | Phase I    | NCT01286987 | Talazoparib treatment presented antitumor activity and was well tolerated in patients with advanced solid tumors including OC [358]                                             |
|             |               | Advanced OC                                   | Phase I    | NCT02316834 | No results posted                                                                                                                                                               |
|             |               | <i>BRCA</i> -mutated OC                       | Phase I    | NCT04598321 | No results posted, recruiting patients                                                                                                                                          |
|             |               | Advanced solid or <i>BRCA</i> -mutated tumors | Phase I/II | NCT01989546 | Talazoparib presented clinical activity and manageable toxicity in patients with advanced solid tumors or <i>BRCA</i> -mutated tumors, including OC                             |
|             |               | <i>BRCA</i> -mutated OC                       | Phase II   | NCT02326844 | Only 3 patients were enrolled, talazoparib showed safe toxicity profiles                                                                                                        |
|             |               | <i>BRCA</i> -mutated recurrent, refractory,   | Phase II   | NCT02286687 | Talazoparib demonstrated clinical benefit in patients with alterations in genes of the <i>BRCA</i> pathway [359]                                                                |

|                  |              |                                                   |            |             |                                                                                                                                                                                                        |
|------------------|--------------|---------------------------------------------------|------------|-------------|--------------------------------------------------------------------------------------------------------------------------------------------------------------------------------------------------------|
|                  |              | advanced or metastatic tumors                     |            |             |                                                                                                                                                                                                        |
|                  | Avelumab     | <i>BRCA</i> - or <i>ATM</i> -mutated solid tumors | Phase II   | NCT03565991 | Talazoparib/avelumab combination was well tolerated and was efficacy mainly in <i>BRCA</i> -associated tumors, including OC. Its efficacy was similar to talazoparib efficacy in monotherapy [360]     |
|                  |              | Advanced or metastatic solid tumors               | Phase II   | NCT03330405 | Talazoparib/avelumab combination had an activity comparable with those with monotherapy treatment. A prolonged duration of the response was observed in <i>BRCA</i> -altered OC patients [361]         |
|                  |              | Advanced OC                                       | Phase III  | NCT03642132 | No results posted for talazoparib/avelumab combination                                                                                                                                                 |
|                  | Belinostat   | Metastatic OC                                     | Phase I    | NCT04703920 | No results posted, recruiting patients                                                                                                                                                                 |
|                  | Radiation    | Recurrent gynecological cancers                   | Phase I    | NCT03968406 | No results posted, recruiting patients                                                                                                                                                                 |
|                  | ZEN003694    | Recurrent OC                                      | Phase II   | NCT05071937 | No results posted, recruiting patients                                                                                                                                                                 |
|                  |              | Advanced solid tumors                             | Phase II   | NCT05327010 | No results posted, recruiting patients                                                                                                                                                                 |
| <b>Pamiparib</b> | -            | OC                                                | Phase II   | NCT05489926 | No results posted, recruiting patients                                                                                                                                                                 |
|                  |              | Advanced solid tumors                             | Phase I/II | NCT03333915 | Pamiparib showed antitumor activity with durable response in platinum-sensitive or platinum-recurrent OC patients with <i>BRCA</i> mutations and had a manageable safety profile [362]                 |
|                  | Surufatinib  | Platinum-resistant OC                             | Phase I/II | NCT05494580 | Not yet recruiting                                                                                                                                                                                     |
|                  | Temozolomide | Advanced or metastatic tumors                     | Phase I/II | NCT03150810 | Pamiparib/temozolomide combination was well tolerated and showed preliminary antitumor activity [363]                                                                                                  |
| <b>Rucaparib</b> | -            | Advanced solid tumors or <i>BRCA</i> -mutated OC  | Phase I/II | NCT01482715 | Rucaparib pharmacokinetics was characterized in patients with solid tumors including HGSC OC. Rucaparib was tolerable and showed activity in platinum-sensitive <i>BRCA</i> -mutated HGSC OC [364-365] |

|  |                                          |                                                                |               |             |                                                                                                                                                                                                                                                                                                                                                                          |
|--|------------------------------------------|----------------------------------------------------------------|---------------|-------------|--------------------------------------------------------------------------------------------------------------------------------------------------------------------------------------------------------------------------------------------------------------------------------------------------------------------------------------------------------------------------|
|  |                                          | Platinum-sensitive relapsed OC                                 | Phase II      | NCT01891344 | Platinum-sensitive OC patients with <i>BRCA</i> -wild type, <i>BRCA</i> mutations, or homologous recombination deficiency treated with rucaparib presented a longer progression-free survival [366-367]                                                                                                                                                                  |
|  |                                          | <i>BRCA</i> -mutated advanced OC                               | Phase II      | NCT00664781 | No results posted                                                                                                                                                                                                                                                                                                                                                        |
|  |                                          | Solid tumors with mutations in HR genes                        | Phase II      | NCT04171700 | No results posted                                                                                                                                                                                                                                                                                                                                                        |
|  |                                          | OC                                                             | Phase III     | NCT04227522 | No results posted, recruiting patients                                                                                                                                                                                                                                                                                                                                   |
|  |                                          | OC                                                             | Phase III     | NCT04676334 | No results posted                                                                                                                                                                                                                                                                                                                                                        |
|  |                                          | OC                                                             | Phase III     | NCT01968213 | Recurrent platinum-sensitive OC patients with two or more prior platinum-base chemotherapy, who were treated with rucaparib as maintenance treatment, presented a longer progression-free survival. Rucaparib treatment was safe and provided a clinical benefit even in patients without mutations of <i>BRCA</i> genes or low loss of genomic heterozygosity [368-370] |
|  |                                          | <i>BRCA</i> -mutated OC                                        | Phase III     | NCT02855944 | Rucaparib demonstrated to be an alternative treatment option to chemotherapy for patients with <i>BRCA</i> -mutated relapsed OC [371]                                                                                                                                                                                                                                    |
|  |                                          | OC                                                             | Observational | NCT04539327 | Rucaparib treatment was safe and presented manageable toxicities [372]                                                                                                                                                                                                                                                                                                   |
|  | Atezolizumab                             | Advanced OC                                                    | Phase I       | NCT03101280 | No results posted                                                                                                                                                                                                                                                                                                                                                        |
|  |                                          | Platinum-sensitive solid tumors or DNA repair-deficient tumors | Phase II      | NCT04276376 | No results posted, recruiting patients                                                                                                                                                                                                                                                                                                                                   |
|  | Carboplatin + paclitaxel +/- bevacizumab | Advanced OC                                                    | Phase I/II    | NCT03462212 | The maximum tolerated dose of rucaparib was established when it was co-administrated with bevacizumab [373]                                                                                                                                                                                                                                                              |
|  | Ipatasertib                              | Advanced OC                                                    | Phase I       | NCT03840200 | No results posted (for OC patients)                                                                                                                                                                                                                                                                                                                                      |

|  |                                         |                       |           |             |                                                                                                                                                                                                                                                             |
|--|-----------------------------------------|-----------------------|-----------|-------------|-------------------------------------------------------------------------------------------------------------------------------------------------------------------------------------------------------------------------------------------------------------|
|  | Lucitanib or Sacituzumab govitecan (SG) | Advanced solid tumors | Phase I   | NCT03992131 | This study suggested an intermittent dosing of PARP inhibitors together with SG to reduce myelosuppression and optimize antitumor efficacy; however, further research is needed. Lucitanib/rucaparib combination had an acceptable safety profile [374-375] |
|  | Mirvetuximab                            | Recurrent OC          | Phase I   | NCT03552471 | No results posted                                                                                                                                                                                                                                           |
|  | Nivolumab                               | OC                    | Phase III | NCT03522246 | Rucaparib treatment was effective as first-line maintenance, conferring a significant benefit in patients with advanced OC with or without homologous recombination deficiency [376]                                                                        |
|  | Nivolumab + bevacizumab                 | Relapsed OC           | Phase II  | NCT02873962 | No results posted, recruiting patients                                                                                                                                                                                                                      |
